# Supplementary material for: Structural predictions of thiolate-protected gold nanoclusters via the redistribution of Au–S “staple” motifs on known cores
Source: Royal Society of Chemistry journal article supplement (doi:10.1039/d0cp01661f), 2020-01-01
Supplement: d0cp01661f1.pdf [file d0cp01661f1.pdf]

Supporting Information:

## **Structural Predictions of Thiolate-Protected Gold Nanoclusters via Redistribution of the Au-S “Staple” Motifs on the Known Core**

Dongdong Lin,<sup>a,b</sup> Mengke Zheng,<sup>a</sup> and Wen Wu Xu <sup>\*a,b</sup>

<sup>a</sup> Department of Physics, School of Physical Science and Technology, Ningbo University, Ningbo 315211, China

<sup>b</sup> Laboratory of Clean Energy Storage and Conversion, Ningbo University, Ningbo 315211, China

\*Correspondence should be addressed to: \**W. W. Xu* (xuwenwu@nbu.edu.cn)

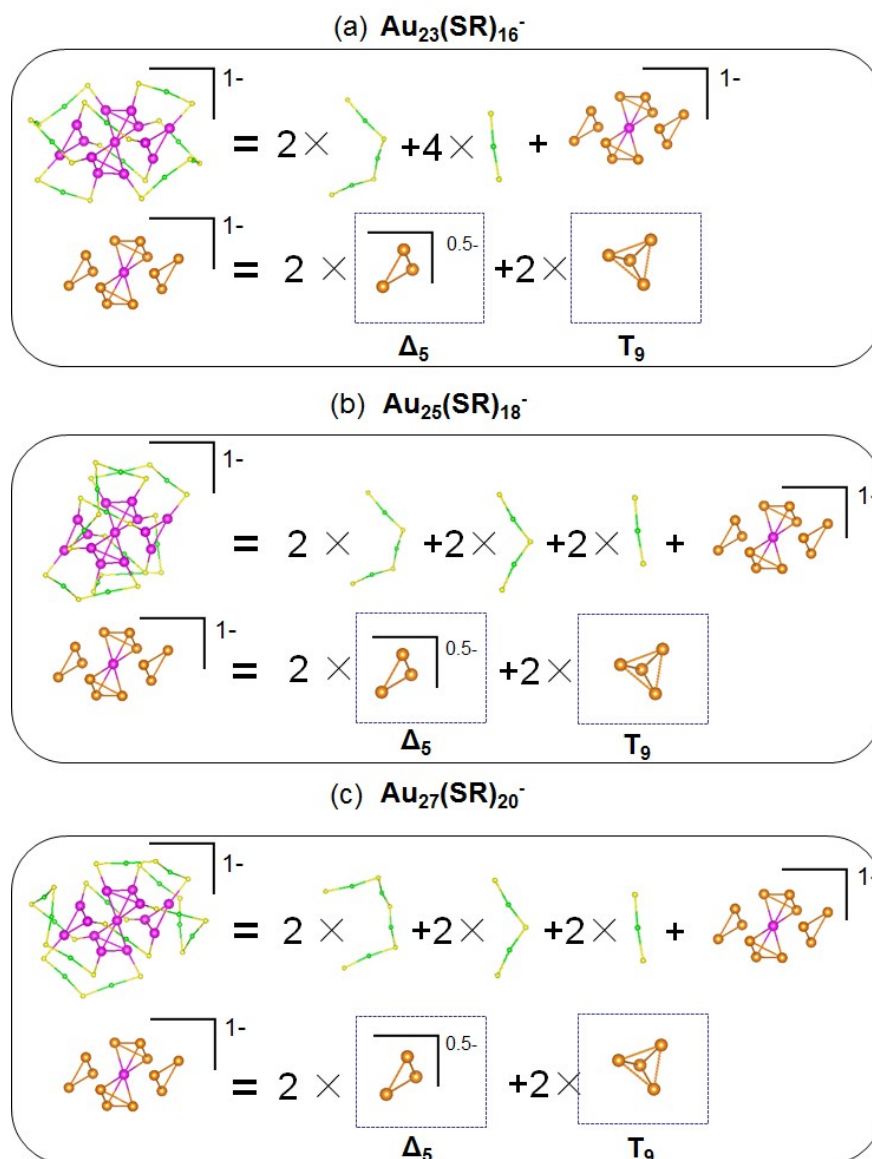

Figure S1. Structural decompositions of  $\text{Au}_{23}(\text{SR})_{16}^-$  (a),  $\text{Au}_{25}(\text{SR})_{18}^-$  (b), and  $\text{Au}_{27}(\text{SR})_{20}^-$  (c). Au atoms with  $1e$  valence electrons are presented in wine and green. Au atoms with  $0.5e$  valence electrons are presented in gold. S is presented in yellow. The R groups were omitted for clarity.

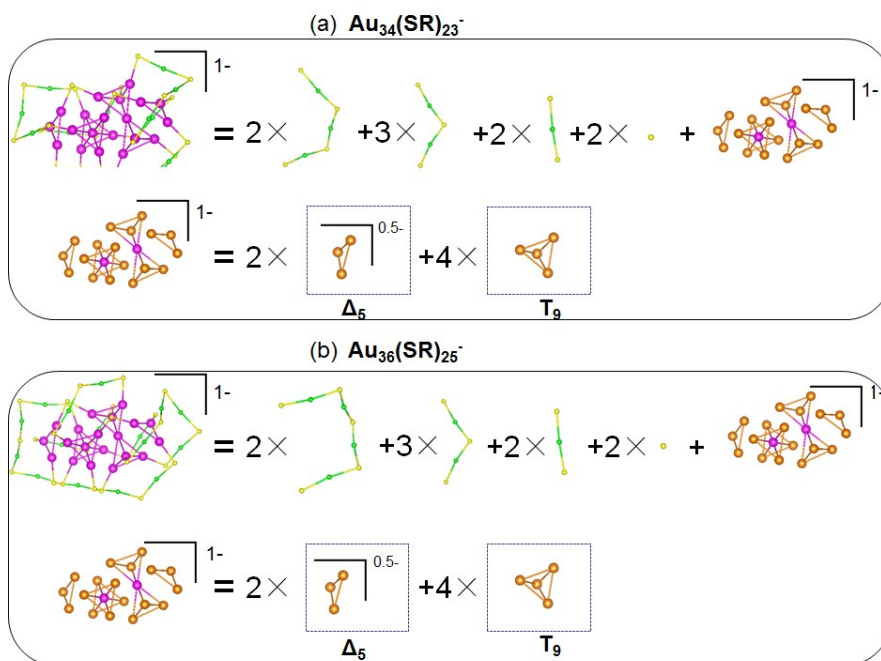

Figure S2. Structural decompositions of  $\text{Au}_{34}(\text{SR})_{21}^-$  (a) and  $\text{Au}_{36}(\text{SR})_{25}^-$  (b). Au atoms with  $1e$  valence electrons are presented in wine and green. Au atoms with  $0.5e$  valence electrons are presented in gold. S is presented in yellow. The R groups were omitted for clarity.

The cartesian coordinates of Au<sub>27</sub>(SH)<sub>20</sub><sup>-</sup>

|    |           |           |           |
|----|-----------|-----------|-----------|
| Au | -0.272920 | -2.734178 | -0.276342 |
| Au | 1.884633  | -1.420451 | -1.502851 |
| Au | 2.414612  | 1.233199  | 1.536267  |
| Au | -2.355622 | -1.492553 | 1.349950  |
| Au | 1.827162  | -1.628694 | 1.249939  |
| Au | 0.021359  | -0.266866 | 3.322675  |
| Au | 4.434188  | -0.589221 | 3.142870  |
| Au | 4.293514  | -0.049119 | 0.062204  |
| Au | 4.954845  | -3.508095 | -0.353828 |
| Au | -1.580378 | 5.081813  | -0.247674 |
| Au | 4.999297  | 2.695817  | 1.878591  |
| S  | 1.308004  | 1.712060  | 3.708680  |
| S  | 3.178944  | -2.612389 | 3.050900  |
| S  | 0.615865  | 5.183461  | 0.667180  |
| S  | -1.188564 | -2.334537 | 3.358446  |
| S  | 3.870567  | -5.612558 | -0.552390 |
| S  | 6.264488  | -1.543321 | -0.112889 |
| S  | 5.871473  | 1.277180  | 3.578590  |
| S  | 4.301665  | 4.356657  | 0.299403  |
| Au | 0.284106  | 2.733345  | 0.256575  |
| Au | -1.880712 | 1.412101  | 1.484991  |
| Au | -2.518871 | -1.165909 | -1.404628 |
| Au | 2.442016  | 1.447516  | -1.243040 |
| Au | -1.885445 | 1.733701  | -1.243182 |
| Au | 0.004021  | 0.211652  | -3.269143 |
| Au | -4.535315 | 0.836004  | -2.823378 |
| Au | -4.299258 | 0.047239  | 0.235021  |
| Au | -4.824543 | 3.197641  | -0.257857 |
| Au | 1.532176  | -5.226084 | -0.732160 |
| Au | -5.368733 | -2.280314 | -1.547792 |
| S  | -1.441533 | -1.672993 | -3.580339 |
| S  | -2.778360 | 2.311966  | -3.486188 |
| S  | -0.837940 | -5.100120 | -0.801786 |
| S  | 1.403321  | 2.156111  | -3.369921 |
| S  | -3.762814 | 5.126327  | -1.174710 |
| S  | -6.242315 | 1.531009  | 0.687133  |
| S  | -6.515961 | -0.512342 | -2.665575 |
| S  | -4.510107 | -4.217651 | -0.433222 |
| Au | -0.009150 | 0.006591  | -0.017938 |
| S  | -3.076050 | 2.118263  | 3.528908  |
| Au | -4.296755 | 0.077164  | 3.380940  |
| Au | -4.983092 | -2.907485 | 1.522925  |
| S  | -5.681440 | -1.868417 | 3.551702  |
| S  | 3.122422  | -2.042075 | -3.526942 |
| Au | 5.149126  | 2.780860  | -1.296511 |
| Au | 4.576888  | -0.209999 | -3.093784 |
| S  | 6.248587  | 1.494153  | -2.968678 |
| H  | -6.488448 | -0.994461 | -3.932404 |
| H  | -5.658318 | -4.943732 | -0.430098 |
| H  | -6.787439 | -1.270686 | 3.043894  |
| H  | -3.447278 | 3.459772  | -3.206292 |
| H  | -3.989101 | 2.874223  | 2.867906  |

|   |           |           |           |
|---|-----------|-----------|-----------|
| H | -6.937379 | 1.284726  | -0.451770 |
| H | -4.330104 | 6.060292  | -0.372502 |
| H | 1.284651  | 5.447179  | -0.480427 |
| H | -2.138583 | -1.932019 | 4.241422  |
| H | 0.407389  | 2.594209  | 3.205064  |
| H | -2.359123 | -1.028859 | -4.345261 |
| H | 0.492809  | 2.991979  | -2.808513 |
| H | -0.951334 | -4.855106 | -2.130434 |
| H | 4.127126  | -5.814786 | -1.867882 |
| H | 6.489879  | -1.677913 | 1.219072  |
| H | 4.027552  | -3.250606 | 2.197639  |
| H | 6.929282  | 0.814309  | 2.867344  |
| H | 5.401315  | 5.151372  | 0.363739  |
| H | 3.904788  | -2.965715 | -2.905571 |
| H | 7.053546  | 0.804937  | -2.122084 |

The cartesian coordinates of  $\text{Au}_{32}(\text{SH})_{21}^-$

|    |           |           |           |
|----|-----------|-----------|-----------|
| Au | 1.692327  | -1.440391 | 4.960355  |
| Au | 4.358390  | 2.796671  | -2.813554 |
| Au | 4.778820  | -2.358872 | -0.406242 |
| Au | 2.493119  | -3.772878 | -0.531558 |
| Au | 2.918118  | -1.753123 | -2.306005 |
| Au | 0.315294  | -3.092855 | -2.339509 |
| Au | 2.624729  | -1.836073 | 1.744499  |
| Au | 0.266217  | -3.956122 | 1.804925  |
| Au | 5.740078  | -0.464667 | 1.946573  |
| Au | 3.239224  | 0.204557  | -0.089740 |
| Au | 0.771990  | -1.249091 | -0.244352 |
| Au | -1.563602 | -2.732085 | -0.309260 |
| Au | -1.233162 | -0.785581 | -2.281560 |
| Au | 1.209954  | 0.957338  | -2.226002 |
| Au | 1.294782  | 0.620173  | 1.899847  |
| Au | -1.291486 | -0.739462 | 1.871092  |
| Au | 1.559902  | 2.762337  | -0.125952 |
| Au | -0.776324 | 1.269548  | -0.152365 |
| Au | -3.246754 | -0.188289 | -0.077791 |
| Au | -4.014973 | -2.668953 | 1.741151  |
| Au | -2.607132 | 1.726191  | 1.882711  |
| Au | -0.336455 | 3.262958  | -2.107798 |
| Au | -0.262831 | 3.832128  | 2.090154  |
| Au | -2.944213 | 1.928091  | -2.140353 |
| Au | -4.783504 | 2.399682  | -0.179539 |
| Au | -2.499242 | 3.820830  | -0.236981 |
| Au | 1.466750  | 4.780430  | -3.999165 |
| S  | 0.032786  | -0.340152 | 6.281469  |
| S  | 3.311599  | -2.831125 | 3.902825  |
| S  | 5.218315  | 1.170860  | -1.326064 |
| S  | 7.007636  | -1.886211 | 0.503426  |
| S  | 1.309541  | -5.670544 | 0.492382  |
| S  | -0.839804 | -2.614738 | 3.424927  |
| S  | 3.318011  | 4.363582  | 0.578492  |
| S  | 2.320653  | -0.200634 | -4.107895 |

|    |           |           |           |
|----|-----------|-----------|-----------|
| S  | 0.846110  | 2.369256  | 3.601123  |
| S  | -3.333996 | -4.386979 | 0.231710  |
| S  | -2.363180 | 0.513685  | -4.055511 |
| S  | -1.294123 | 5.639897  | 0.896231  |
| S  | -7.006616 | 1.868405  | 0.711530  |
| S  | -0.856160 | 5.151958  | -3.644980 |
| S  | 3.778248  | 4.455151  | -4.425689 |
| Au | -1.594844 | 0.905835  | 5.040103  |
| S  | -3.213268 | 2.426260  | 4.173526  |
| H  | 7.276843  | -0.932401 | -0.423993 |
| H  | 4.089162  | 4.100088  | -0.513747 |
| H  | 2.075365  | 2.957818  | 3.488918  |
| H  | -2.260217 | 5.884639  | 1.815936  |
| H  | -0.712484 | 6.105299  | -2.691358 |
| H  | 3.457740  | 0.545483  | -4.046968 |
| H  | 3.628534  | 3.605150  | -5.471150 |
| H  | 5.613432  | 2.022159  | -0.344133 |
| H  | -3.501488 | -0.233868 | -4.047357 |
| H  | -7.296870 | 1.000656  | -0.290680 |
| H  | -4.095465 | -4.017479 | -0.839470 |
| H  | 2.282887  | -5.960701 | 1.390831  |
| H  | -2.069987 | -3.194315 | 3.286144  |
| H  | 4.379498  | -2.010895 | 4.074435  |
| H  | 0.761953  | 0.748649  | 6.627084  |
| H  | -4.290286 | 1.605858  | 4.271186  |
| S  | 4.753015  | 0.958707  | 3.580268  |
| Au | 4.017609  | 2.528278  | 1.933746  |
| Au | -5.737066 | 0.320462  | 2.015293  |
| S  | -4.741585 | -1.239976 | 3.513727  |
| S  | 0.815965  | -4.904224 | -3.979665 |
| S  | -5.239192 | -1.053338 | -1.366071 |
| Au | -1.497122 | -4.470205 | -4.318084 |
| Au | -4.369099 | -2.548924 | -2.978621 |
| S  | -3.777969 | -4.007270 | -4.769589 |
| H  | -5.618067 | -1.983548 | -0.451172 |
| H  | -4.296612 | -5.138820 | -4.232337 |
| H  | 0.657204  | -5.894581 | -3.067041 |
| H  | -5.878642 | -1.906407 | 3.839693  |
| H  | 5.891501  | 1.598964  | 3.951041  |

The cartesian coordinates of  $\text{Au}_{34}(\text{SH})_{23}^-$

|    |           |           |           |
|----|-----------|-----------|-----------|
| Au | -6.617837 | -2.824056 | -0.773118 |
| Au | -5.153146 | -2.639047 | 2.379696  |
| Au | -5.360120 | -0.304749 | 0.355901  |
| Au | -4.027178 | -0.258223 | -2.037507 |
| Au | -3.518890 | -2.215596 | -0.197962 |
| Au | -1.834757 | -2.104011 | -2.614325 |
| Au | -3.207640 | 1.888257  | -0.161592 |
| Au | -2.170667 | 2.187681  | -3.126190 |
| Au | -2.156813 | 1.821725  | 4.319174  |
| Au | -2.749537 | -0.080492 | 1.781927  |
| Au | -1.329173 | -0.094505 | -0.687757 |

|    |           |           |           |
|----|-----------|-----------|-----------|
| Au | -0.027981 | -0.031672 | -3.129155 |
| Au | 0.641073  | -2.098767 | -1.365974 |
| Au | -0.649359 | -2.186713 | 1.300761  |
| Au | -0.812185 | 1.905987  | 1.325471  |
| Au | 0.769285  | 1.997885  | -1.115511 |
| Au | 0.043080  | -0.248734 | 3.186138  |
| Au | 1.318301  | -0.121887 | 0.746935  |
| Au | 2.730105  | 0.065773  | -1.730228 |
| Au | 5.170423  | 2.227605  | -2.364049 |
| Au | 3.188653  | 1.894501  | 0.325922  |
| Au | 1.848407  | -2.265490 | 2.503112  |
| Au | 2.114648  | 2.008290  | 3.291290  |
| Au | 3.534305  | -2.218422 | 0.076811  |
| Au | 5.359055  | -0.269664 | -0.376578 |
| Au | 4.037331  | -0.370475 | 2.023145  |
| Au | 4.952913  | -3.018872 | 3.138063  |
| Au | 6.719439  | -2.790376 | 0.570930  |
| S  | -6.547426 | -4.177172 | 1.198223  |
| S  | -7.086627 | -1.800472 | -2.903664 |
| S  | -3.762601 | -1.289645 | 3.739606  |
| S  | -7.084724 | 0.949030  | 1.583291  |
| S  | -4.012872 | 1.039616  | -4.130776 |
| S  | -0.457148 | 3.688410  | -2.454238 |
| S  | -0.710027 | 0.313552  | 5.469276  |
| S  | -2.141155 | -4.065774 | 0.717609  |
| S  | 0.330597  | 3.501727  | 2.816677  |
| S  | 0.643748  | 0.656008  | -5.425307 |
| S  | 2.089011  | -4.032156 | -0.830141 |
| S  | 4.002403  | 0.822162  | 4.167355  |
| S  | 7.070200  | 1.000876  | -1.609743 |
| S  | 2.934518  | -4.188160 | 3.607807  |
| S  | 7.083830  | -1.955938 | 2.798062  |
| S  | 6.752952  | -3.933031 | -1.531690 |
| Au | 5.129904  | -2.492174 | -2.530091 |
| S  | 3.597944  | -1.160959 | -3.754747 |
| S  | 3.540193  | 3.727419  | -3.233699 |
| Au | 2.150934  | 2.055588  | -4.212753 |
| Au | -4.947955 | -2.772441 | -3.410184 |
| S  | -2.910266 | -3.855488 | -3.988303 |
| S  | -3.565346 | 3.540268  | 3.453105  |
| Au | -5.207173 | 2.122491  | 2.474744  |
| S  | -4.043083 | 4.196199  | -0.504369 |
| S  | 4.086487  | 4.169089  | 0.761139  |
| Au | -1.944042 | 5.235161  | -0.108588 |
| Au | 2.023566  | 5.251569  | 0.249758  |
| S  | 0.041078  | 6.576860  | 0.024537  |
| H  | -5.522850 | -4.969086 | 0.794455  |
| H  | -7.870658 | -2.797368 | -3.390305 |
| H  | -2.719106 | -3.228252 | -5.175034 |
| H  | -4.662724 | -0.306471 | 3.995737  |
| H  | -1.596376 | -0.712267 | 5.534741  |
| H  | -4.253363 | 3.821589  | 4.588879  |
| H  | -7.217170 | 0.041381  | 2.582247  |

|   |           |           |           |
|---|-----------|-----------|-----------|
| H | -1.487329 | -4.366278 | -0.432197 |
| H | 2.711819  | -4.119220 | -2.033036 |
| H | 1.524705  | -0.354248 | -5.635515 |
| H | 4.226530  | 4.087627  | -4.348264 |
| H | 7.132514  | 0.140472  | -2.656255 |
| H | 2.568846  | -2.046880 | -3.726378 |
| H | 5.873773  | -4.903558 | -1.180401 |
| H | 7.876202  | -2.974391 | 3.223026  |
| H | 2.943308  | -4.951729 | 2.486716  |
| H | 4.914941  | 1.757669  | 3.806095  |
| H | 0.990860  | 4.214698  | 1.831823  |
| H | 4.657092  | 4.309766  | -0.462966 |
| H | 0.122292  | 6.759331  | -1.315513 |
| H | -4.550101 | 4.344008  | 0.746390  |
| H | 0.322083  | 3.526052  | -3.569411 |
| H | -4.952814 | 1.932679  | -3.733802 |

The cartesian coordinates of Au<sub>36</sub>(SH)<sub>25</sub><sup>-</sup>

|    |           |           |           |
|----|-----------|-----------|-----------|
| Au | 7.084926  | 0.595381  | -2.161466 |
| Au | -1.144056 | 5.004830  | 1.579069  |
| Au | -5.484235 | -0.215900 | -0.542211 |
| Au | -4.159188 | -0.087524 | 1.822906  |
| Au | -3.644562 | 1.745933  | -0.218115 |
| Au | -2.033093 | 1.891836  | 2.220089  |
| Au | -3.232044 | -2.257170 | 0.023778  |
| Au | -2.196540 | -2.500758 | 2.952802  |
| Au | -5.008819 | -2.662668 | -2.635603 |
| Au | -2.653637 | -0.416951 | -1.974464 |
| Au | -1.391416 | -0.218826 | 0.565151  |
| Au | -0.280151 | -0.167892 | 3.079567  |
| Au | 0.599699  | 1.844401  | 1.328990  |
| Au | -0.596653 | 1.803959  | -1.382771 |
| Au | -0.732799 | -2.322055 | -1.251826 |
| Au | 0.725121  | -2.290801 | 1.290096  |
| Au | 0.278844  | -0.249405 | -3.093417 |
| Au | 1.384541  | -0.232913 | -0.576543 |
| Au | 2.643706  | -0.366642 | 1.967046  |
| Au | 1.816702  | -2.401715 | 4.225202  |
| Au | 3.227825  | -2.254898 | 0.017920  |
| Au | 2.029060  | 1.824983  | -2.296198 |
| Au | 2.208896  | -2.561870 | -2.908153 |
| Au | 3.640790  | 1.759698  | 0.155114  |
| Au | 5.476751  | -0.193813 | 0.556748  |
| Au | 4.172487  | -0.126371 | -1.822986 |
| Au | 1.123577  | 4.953640  | -1.721477 |
| S  | 8.289590  | -1.426291 | -1.809122 |
| S  | 6.151956  | 2.759948  | -2.637579 |
| S  | -3.570517 | 0.692275  | -4.026799 |
| S  | -6.976607 | -1.398159 | -2.129705 |
| S  | -3.762343 | -1.069991 | 4.066971  |
| S  | -0.726251 | -4.157216 | 2.058491  |
| S  | -0.383962 | -1.009651 | -5.351572 |



|    |           |           |           |
|----|-----------|-----------|-----------|
| S  | -2.325045 | 3.549919  | -1.277339 |
| S  | 0.726428  | -4.194208 | -1.990677 |
| S  | 0.363327  | -0.881780 | 5.360492  |
| S  | 2.337026  | 3.587254  | 1.194141  |
| S  | 3.791739  | -1.164596 | -4.041919 |
| S  | 6.956360  | -1.338812 | 2.184228  |
| S  | 2.473270  | 3.958160  | -3.412571 |
| S  | -0.096466 | 6.274831  | -0.149429 |
| Au | 6.322302  | -2.656977 | -1.226366 |
| S  | 4.576613  | -4.190782 | -0.733304 |
| H  | -6.856428 | -0.483386 | -3.127367 |
| H  | -1.308557 | -0.032513 | -5.535998 |
| H  | 0.045747  | -4.445052 | -3.139293 |
| H  | 4.839286  | -2.023785 | -3.955908 |
| H  | 3.670950  | 4.202265  | -2.825502 |
| H  | -2.811552 | 3.349492  | -2.530964 |
| H  | 0.990812  | 6.651613  | 0.567362  |
| H  | -4.339038 | -0.360020 | -4.405657 |
| H  | 2.837847  | 3.390014  | 2.443723  |
| H  | 6.824666  | -0.404188 | 3.162134  |
| H  | 1.297037  | 0.089493  | 5.530733  |
| H  | -4.816102 | -1.924134 | 4.009869  |
| H  | -0.042722 | -4.392189 | 3.208748  |
| H  | 7.301261  | 3.399778  | -2.977031 |
| H  | 8.649696  | -1.152801 | -0.530021 |
| H  | 5.043868  | -4.539155 | 0.493884  |
| S  | -3.285802 | -4.181545 | -3.280105 |
| Au | -1.841057 | -2.497592 | -4.181049 |
| Au | 4.987090  | -2.598171 | 2.696790  |
| S  | 3.262887  | -4.106079 | 3.365160  |
| S  | -2.407962 | 4.044405  | 3.354961  |
| S  | 3.548942  | 0.773265  | 4.009802  |
| Au | 6.416547  | 2.922869  | -0.254144 |
| Au | 5.254408  | 1.965607  | 2.870812  |
| S  | 7.003701  | 3.350411  | 2.017286  |
| H  | 4.316224  | -0.273297 | 4.406954  |
| H  | 7.990168  | 2.423042  | 2.093478  |
| H  | -1.362498 | 3.878186  | 4.203026  |
| H  | 3.821921  | -4.491967 | 4.540928  |
| H  | -3.848305 | -4.591087 | -4.446218 |
| S  | -4.590233 | -4.165433 | 0.824404  |
| Au | -6.317060 | -2.610939 | 1.324781  |
| Au | -5.273506 | 1.897913  | -2.894962 |
| S  | -8.264038 | -1.357520 | 1.926486  |
| S  | -7.027649 | 3.283954  | -2.053399 |
| Au | -7.048322 | 0.671655  | 2.201913  |
| Au | -6.397406 | 2.935241  | 0.220373  |
| S  | -6.067518 | 2.829322  | 2.596831  |
| H  | -5.079425 | -4.524996 | -0.391149 |
| H  | -8.659300 | -1.117417 | 0.651356  |
| H  | -7.204914 | 3.485089  | 2.948516  |
| H  | -7.999185 | 2.338283  | -2.081683 |
